# Supplementary material for: From ArrayExpress to BioStudies
Source: PubMed Central journal article supplement (PMC7778911; doi:10.1093/nar/gkaa1062), 2020-11-19
Supplement: gkaa1062_supplemental_file.pdf [file gkaa1062_supplemental_file.pdf]

## ArrayExpress to BioStudies API Migration Guide

We are in the process of migrating ArrayExpress to BioStudies as a collection. As a result, there would be some changes in the API support for ArrayExpress. Until announced, the current version of the API will continue to work. Some of the major changes are:

### XML to JSON

XML API responses are being deprecated in favour of JSON. However, XML representation is available for individual experiments in a more general [PageTab schema](#). We encourage you to shift to the new JSON schema which should have all the information available in the current AE JSON.

### Response bundling

Search API will return a paged response containing only the metadata about the experiments. Results would not be bundled and you'll have to iterate through the set and request each experiment individually.

### Endpoint changes

The endpoint has changed from <https://www.ebi.ac.uk/arrayexpress/xml/v3> to <https://www.ebi.ac.uk/biostudies/api/v1>. A list of all searchable fields and their BioStudies equivalent is given below. These fields are in addition to the [default BioStudies search criteria fields](#). Please send all questions and feedback to [biostudies@ebi.ac.uk](mailto:biostudies@ebi.ac.uk).

| Current Field | New Field           | What is searched?                                                                                                                                                                                                                                                                                                          | ArrayExpress Example                                                          | BioStudies URL                                                              |
|---------------|---------------------|----------------------------------------------------------------------------------------------------------------------------------------------------------------------------------------------------------------------------------------------------------------------------------------------------------------------------|-------------------------------------------------------------------------------|-----------------------------------------------------------------------------|
| accession     |                     | Experiment primary ArrayExpress or secondary (GEO, ENA, EGA etc) accession                                                                                                                                                                                                                                                 | <code>&lt;endpoint&gt;/experiments?accession=E-MEXP-31</code>                 | <code>&lt;endpoint&gt;/studies/E-MEXP-31</code>                             |
| array         | TBD                 | Array design accession or name (wildcards supported)                                                                                                                                                                                                                                                                       | <code>&lt;endpoint&gt;/files?array=A-AFFY-33</code>                           | <code>&lt;endpoint&gt;/files/A-AFFY-33</code>                               |
| expdesign     | experimental_design | Experiment design type, related to the questions being addressed by the study, e.g. "time series design", "stimulus or stress design", "genetic modification design". Has EFO expansion.                                                                                                                                   | <code>&lt;endpoint&gt;/files?expdesign=dose+response</code>                   | <code>&lt;endpoint&gt;/search?experimental_design="dose response"</code>    |
| exptype       | study_type          | Experiment type, related to the assay technology used. List of experiment types in ArrayExpress. Has EFO expansion.                                                                                                                                                                                                        | <code>&lt;endpoint&gt;/experiments?exptype="RNA-seq of non coding RNA"</code> | <code>&lt;endpoint&gt;/search?study_type="RNA-seq of non coding RNA"</code> |
| ef/ev         | experimental_factor | Experimental factor (also called experimental variable), the name of the main variable under study in an experiment. E.g. if the factor is "sex" in a human study, the researchers would be comparing between male and female samples, and "sex" is not merely an attribute the samples happen to have. Has EFO expansion. | <code>&lt;endpoint&gt;/experiments?ef="cell type"</code>                      | <code>&lt;endpoint&gt;/search?experimental_factor="cell type"</code>        |

|             |                              |                                                                                                                                                                                                                                                                                                                 |                                               |                                                      |
|-------------|------------------------------|-----------------------------------------------------------------------------------------------------------------------------------------------------------------------------------------------------------------------------------------------------------------------------------------------------------------|-----------------------------------------------|------------------------------------------------------|
| efv/evv     | experimental_factor_value    | The value of an experimental factor. E.g. The values for "genotype" factor can be "wild type genotype", "p53/-". Has EFO expansion.                                                                                                                                                                             | <endpoint>/experiments?efv=HeLa               | <endpoint>/search?experimental_factor_value=HeLa     |
| sa          | source_characteristics       | Sample attribute values, e.g. "male", "liver". Has EFO expansion.                                                                                                                                                                                                                                               | <endpoint>/files?sa=fibroblast                | <endpoint>/search?source_characteristics=fibroblast  |
| sac         | source_characteristics_value | Sample attribute category that is defined in an experiment, e.g. "age", "cell type", "disease". Has EFO expansion.                                                                                                                                                                                              | <endpoint>/files?sac=age                      | <endpoint>/search?source_characteristics_value=age   |
| species     | organism                     | Species of the samples. Can use common name (e.g. "mouse") or binomial nomenclature/Latin names (e.g. "Mus musculus"). Has EFO expansion.                                                                                                                                                                       | <endpoint>/experiments?species="homo sapiens" | <endpoint>/search?organism="homo sapien"             |
| pmid        |                              | PubMed identifier                                                                                                                                                                                                                                                                                               | <endpoint>/experiments?pmid=16553887          | <endpoint>/search?link_type=pmid&link_value=16553887 |
| gxa         | gxa                          | Presence ("true") / absence ("false") of an ArrayExpress experiment in the Expression Atlas.                                                                                                                                                                                                                    | <endpoint>/experiments?gxa=true               | <endpoint>/search?gxa=true                           |
| directsub   |                              | If "true" only returns experiments directly submitted to ArrayExpress (i.e. not imported from GEO). For more information about how we import data from GEO see the GEO data help page.                                                                                                                          | <endpoint>/experiments?directsub=true         | TBD                                                  |
| raw         | raw                          | Experiment has raw data available.                                                                                                                                                                                                                                                                              | <endpoint>/experiments?raw=true               | <endpoint>/search?raw=true                           |
| processed   | processed                    | Experiment has processed data available.                                                                                                                                                                                                                                                                        | <endpoint>/experiments?processed=true         | <endpoint>/search?processed=true                     |
| assaycount  | assay_count                  | The number of of assays where $x \leq y$ and both values are between 0 and 99,999 (inclusive). To count excluding the values given use curly brackets e.g. assaycount={1 TO 5} will find experiments with 2-4 assays. Single numbers may also be given e.g. assaycount=10 will find experiments with 10 assays. | <endpoint>/experiments?assaycount=[1 TO 5]    | <endpoint>/search?assay_count=[1 TO 5]               |
| samplecount | sample_count                 | The number of samples                                                                                                                                                                                                                                                                                           | <endpoint>/experiments?samplecount=[1 TO 5]   | <endpoint>/search?sample_count=[1 TO 5]              |
| efcount     | experimental_factor_count    | The number of experimental factors                                                                                                                                                                                                                                                                              | <endpoint>/experiments?efcount=[1 TO 5]       | <endpoint>/search?experimental_factor_count=[1 TO 5] |
